# Supplementary material
Source: publisher figshare collection journal article supplement (https://acs.figshare.com/ndownloader/files/3907354)
Supplement: Supplementary file 1 [file 3907354]

## Supporting Information for

Free-standing three-dimensional graphene/manganese oxide  
hybrid as binder-free electrode material for energy storage  
applications

*Xiaoli Zhu<sup>a,d,†</sup>, Peng Zhang<sup>a,d,†</sup>, Shan Xu<sup>c</sup>, Xingbin Yan,<sup>\* a,b</sup> and Qunji Xue<sup>b</sup>*

<sup>a</sup> Laboratory of Clean Energy Chemistry and Materials, Lanzhou Institute of Chemical Physics, Chinese Academy of Science, Lanzhou 730000, P. R. China

<sup>b</sup> State Key Laboratory of Solid Lubrication, Lanzhou Institute of Chemical Physics, Chinese Academy of Sciences, Lanzhou, 730000, China

<sup>c</sup> State Key Laboratory for Oxo Synthesis and Selective Oxidation, Lanzhou Institute of Chemical Physics, Chinese Academy of Sciences, Lanzhou 730000, P.R. China

<sup>d</sup> Graduate University of Chinese Academy of Sciences, Chinese Academy of Sciences, Beijing, 100080, China

\* Corresponding author. Email address: [xbyan@licp.cas.cn](mailto:xbyan@licp.cas.cn)

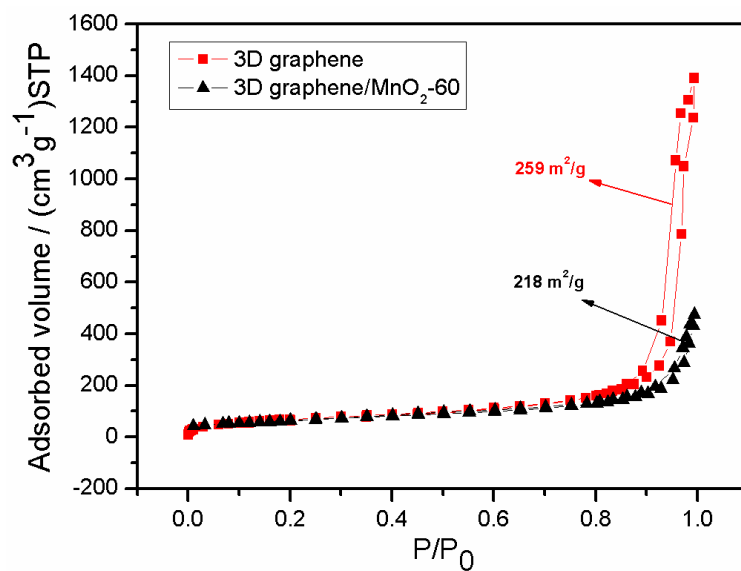

Figure S1. Nitrogen adsorption/desorption isotherms of 3D graphene and 3D graphene/MnO<sub>2</sub>-60 samples.

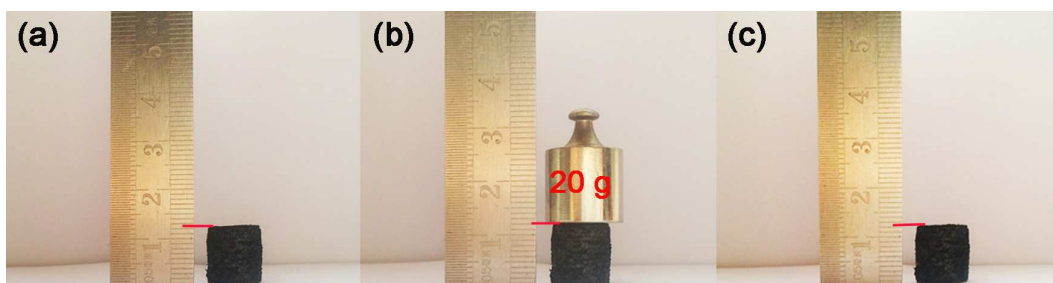

Figure S2. Digital photographs of a freestanding 3D graphene/MnO<sub>2</sub>-60: (a) initial status, (b) supporting weight, and (c) releasing weight. The sample of 3D graphene/MnO<sub>2</sub>-60 can endure a weight of 20 g without any damage and deformation, exhibiting the desirable strength property.

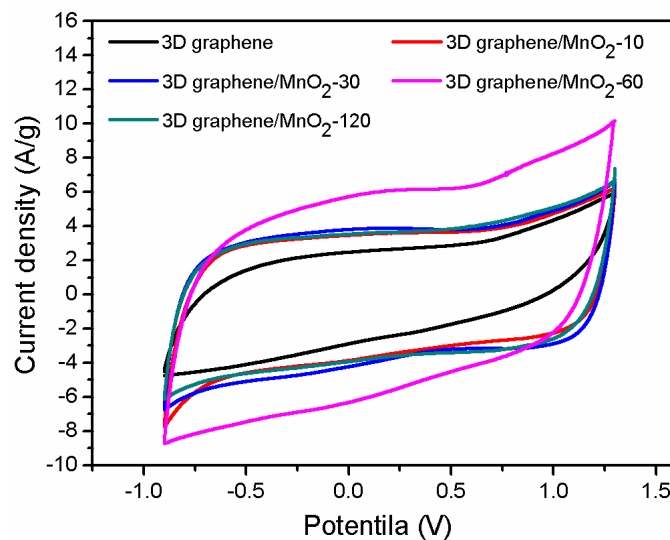

Figure S3. CVs of the 3D graphene and 3D graphene/MnO<sub>2</sub> hybrids prepared with different reaction times at scans rates of 50 mV/s. Among the four different 3D graphene/MnO<sub>2</sub> hybrids, the 3D graphene/MnO<sub>2</sub>-60 sample displays the largest area of CV profile. It also can be seen that there is no obvious difference of the CVs between the 3D graphene/MnO<sub>2</sub>-30 and the 3D graphene/MnO<sub>2</sub>-120, indicating that the over-high MnO<sub>2</sub> loading would lead to the decrease of the specific capacitance. The results show that the 3D graphene/MnO<sub>2</sub>-60 delivers high specific capacitance.

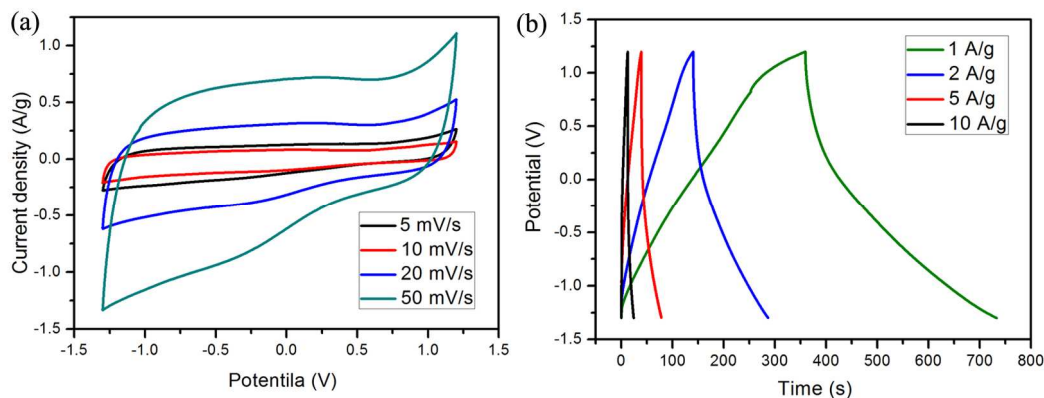

Figure S4. (a) CVs of the 3D graphene at scan rates of 5, 10, 20, and 50 mV/s. (b) Galvanostatic charging/discharging curves of the 3D graphene at different current densities. It can be seen that 3D graphene electrode shows relatively rectangular CV curves, indicating a nearly ideal supercapacitor behavior. Also, the 3D graphene

electrode presents approximate symmetric charge/discharge curves and good capacitive behavior with a rapid  $I$ - $V$  response. At same time, it is achieving high-capacitance performance with the specific capacitance up to 150 F/g at 1 A/g.

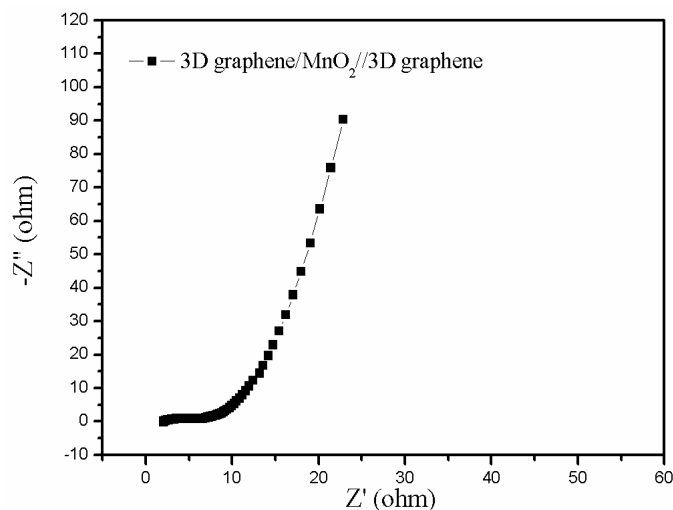

Figure S5. Nyquist plot of as-made asymmetric supercapacitor. The series resistance of the asymmetric supercapacitor is  $\sim 2.7 \Omega$ , indicating a low internal resistance for the whole device.

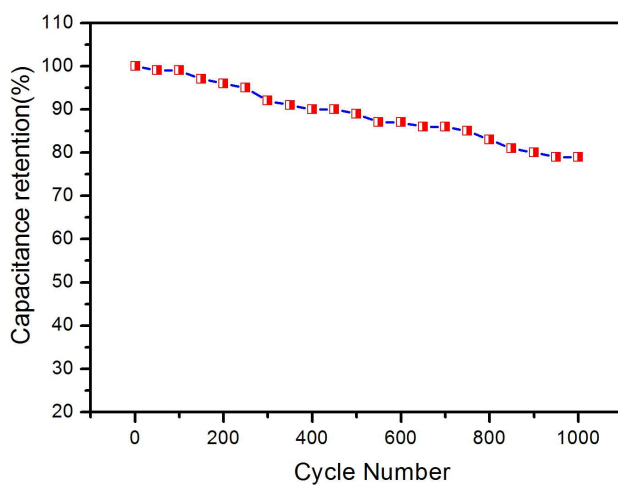

Figure S6. Cycling performance of as-made asymmetric supercapacitor testing at a current density of 10A/g. After 1000 charging/discharging cycles, the capacitance retention rates remained over 80%. The decay is mainly due to the relatively poor stability of MnO<sub>2</sub> in ionic liquid electrolyte.
